# Supplementary material for: Alzheimer’s disease with sleep insufficiency: a cross-sectional study on correlations among clinical characteristics, orexin, its receptors, and the blood-brain barrier
Source: PubMed Central journal article supplement — Neural Regen Res. 2022 Nov 9;18(8):1757–62. doi: 10.4103/1673-5374.360250 (PMC10154498; doi:10.4103/1673-5374.360250), 2022-11-09

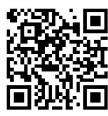

### 首都医科大学医学伦理委员会科研项目审批件

审查编号: Z2019SY015

|                                                                                                                                                                                  |                                      |            |                  |                  |
|----------------------------------------------------------------------------------------------------------------------------------------------------------------------------------|--------------------------------------|------------|------------------|------------------|
| 项目名称                                                                                                                                                                             | 基于网络咨询的手机 APP 自我健康管理模式预防痴呆的<br>实施性研究 |            |                  |                  |
| 项目来源                                                                                                                                                                             | 科技部                                  | 项目编号       |                  |                  |
| 申请人<br>(项目负责人)                                                                                                                                                                   | 王友信                                  |            |                  |                  |
| 承担单位(院系)                                                                                                                                                                         | 公共卫生学院                               |            |                  |                  |
| 伦理委员会出席人数(5)人                                                                                                                                                                    |                                      | 特邀专业专家(2)人 |                  |                  |
| 结论                                                                                                                                                                               | 同意 5 票                               | 不同意 0 票    | 作必要修改后<br>同意 0 票 | 作必要修改后<br>重审 0 票 |
| <p>审批意见:</p> <p>经审核, 同意开展研究。</p> <p style="text-align: right;">伦理委员会主任: <br/>2019年4月23日</p> |                                      |            |                  |                  |

首都医科大学  
医学伦理委员会  
(盖章)

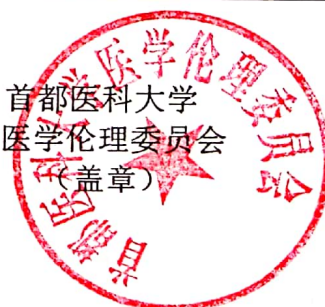

Supplement: NRR-18-1757_Suppl2.pdf [file NRR-18-1757_Suppl2.pdf]
