# Supplementary material for: Alzheimer’s disease with sleep insufficiency: a cross-sectional study on correlations among clinical characteristics, orexin, its receptors, and the blood-brain barrier
Source: PubMed Central journal article supplement — Neural Regen Res. 2022 Nov 9;18(8):1757–62. doi: 10.4103/1673-5374.360250 (PMC10154498; doi:10.4103/1673-5374.360250), 2022-11-09
Supplement: NRR-18-1757_Suppl1.pdf [file NRR-18-1757_Suppl1.pdf]

# 知情同意书

您将被邀请参加由北京天坛医院进行的一项阿尔茨海默病的临床研究，本知情同意书提供给您一些信息以帮助您决定是否参加此项临床研究。您参加本项研究是自愿的。本次研究已通过本研究机构伦理审查委员会审查。

请您仔细阅读，如有任何疑问请向负责该项研究的研究者提出。

## 研究背景及目的：

人口老龄化进程使阿尔茨海默病的发病率日益增高。本研究主要通过对阿尔茨海默病患者进行相关量表测评，检测血清、唾液及脑脊液等样本中一系列生物化学指标，包括相关基因多态性、神经病理蛋白、铁代谢相关蛋白、神经免疫炎症因子、神经营养因子、氧化应激相关因子及神经递质水平等；进行嗅觉、视觉、听觉、睡眠、电生理、黑质超声、头核磁及PET等检查，评价阿尔茨海默病患者的临床症状及发生机制，为优化治疗方案提供临床依据。人口老龄化进程使阿尔茨海默病（Alzheimer's disease, AD）的发病率日益增高。AD痴呆期病程难以逆转，进行AD痴呆前期诊断具有重要意义。本研究主要通过对AD患者和轻度认知障碍（MCI）患者临床症状进行量表测评，检测血清、唾液及脑脊液等样本中一系列生物化学指标，包括相关基因多态性、神经病理蛋白、铁代谢相关蛋白、神经免疫炎症因子、神经营养因子、氧化应激相关因子及神经递质水平等；进行嗅觉、视觉、听觉、睡眠、口腔、睡眠、电生理、头核磁、脑电图及PET等检查，评价阿尔茨海默病患者的临床症状及发生机制，为优化治疗方案提供临床依据。

## 研究内容：

对认知障碍患者进行临床症状量表测评，并留取外周静脉血、唾液及脑脊液，进行相关基因的检查，检测血清、唾液及脑脊液中神经病理蛋白、铁代谢相关蛋白、神经免疫炎症因子、神经营养因子、氧化应激因子及神经递质等水平，完善嗅觉、视觉、听觉、睡眠、电生理及神经影像学检查（黑质超声、头核磁及PET等），通过统计分析，明确与认知障碍发病有关的指标，以此研究其发病机制。

如果您同意参与这项研究，我们将对每位受试者进行编号，建立病历档案，进行相关问卷调查，同时需要采集您的血液、唾液及脑脊液等体液标本，进行如嗅觉功能、视频多导睡眠图等检查，以上都将由专业人员为您取样和检查，您的样品仅用于研究。

## 可能的获益：

对您的相关临床资料、标本检测及必要辅助检查将有助于对疾病做出诊断，同时问卷调查将有助于了解您是否存在临床症状，对认知障碍疾病的早期诊断提供依据，为您的治疗提供必要的建议。

但您不会因参加本研究而获得任何酬劳。

### **风险与不适：**

您的血液样本的采集将严格按照无菌要求操作，标本的采集可能会有一些非常小的风险，如短暂的疼痛、局部青紫，少数人可能有轻度头晕，或极为罕见的针头感染。

您的脑脊液标本的采集将在获得您和家属的知情同意后进行，可能出现以下风险：术后低颅压性头痛、虚性脑膜炎、腰背痛等；穿刺部位出血，包括皮肤、软组织出血；局部组织的其他损伤，如感染、疼痛等；腰椎穿刺不成功及其他不可预知的意外。还可能出现以下罕见情况，包括：颅内压变化导致呕吐、病情加重，甚至脑疝、呼吸、心跳骤停；麻醉意外，包括麻醉药物过敏及副作用，如恶心、呕吐、荨麻疹、癫痫、甚至过敏性休克；椎管内出血、蛛网膜下腔出血、硬膜下血肿等；穿刺过程中有可能发生神经系统损伤，造成一过性肢体麻木、疼痛等。

若您参加嗅觉功能检测，将采用欧洲通用的 Sniffin' Sticks 测试，由经过培训的研究者按照国际规范进行，检测过程中可能有一些风险，如鼻部短暂的不适、轻微过敏反应、头晕等。

若您参加睡眠监测，将由我院睡眠专科的医生及技师按照国际规范及标准进行，检测过程中可能有一些不适及风险，比如在陌生环境中睡觉容易紧张、焦虑，甚至无法入睡，肌电检测针刺部位轻微疼痛、过敏和感染等。

如果您的健康确因参加这项研究而发生损害，请立即通知研究医生，医生将对您采取适当的治疗措施。

### **隐私保护：**

如果您决定参加本项研究，您的个人资料均属保密。您的血液、脑脊液标本及调查问卷将以研究编号加以标识。可以识别您身份的信息不会透露给研究小组以外的任何成员，除非获得您的许可。

### **自由退出：**

参加本研究是完全自愿的。一旦参加，您作为受试者，可随时了解与本研究有关的信息资料。在参加研究期间，请您提供有关自身病史和身体的真实情况；告诉研究医生在研究期间出现的任何不适；告诉研究医生最近是否曾参与其他研究，或目前正参与其他研究。

### **联系方式：**

如果您有与本研究有关的问题，或您在研究过程中发生了任何不适与损伤，或有关于本项研究参

加者权益方面的问题，您可以与认知障碍科张巍主任联系。

**研究医师声明：**

我确认已向患者解释了本研究的详细情况，特别是参加本研究可能产生的风险和收益。

研究医师签名： \_\_\_\_\_

日期： \_\_\_\_\_年\_\_\_\_月\_\_\_\_日

**知情同意签字：**

我的医生已经将本研究的目的、内容、风险和受益情况向我作了详细的解释和说明，对我询问的所有问题也给予了解答，我对此项临床研究已经了解，我自愿参加本项研究。

受试者签名： \_\_\_\_\_

日期： \_\_\_\_\_年\_\_\_\_月\_\_\_\_日

若患者无法签署，请其授权委托人签署知情同意书。

授权委托人签名： \_\_\_\_\_

日期： \_\_\_\_\_年\_\_\_\_月\_\_\_\_日
